# Supplementary material for: Superelastic Radiative Cooling Metafabric for Comfortable Epidermal Electrophysiological Monitoring
Source: Nanomicro Lett. 2023 Jul 13;15:181. doi: 10.1007/s40820-023-01156-9 (PMC10344855; doi:10.1007/s40820-023-01156-9)
Supplement: Supplementary file 1 — Supplementary file1 (PDF 922 KB) [file 40820_2023_1156_MOESM1_ESM.pdf]

Supporting Information for

## Superelastic Radiative Cooling Metafabric for Comfortable

### Epidermal Electrophysiological Monitoring

Jiancheng Dong<sup>1</sup>, Yidong Peng<sup>1</sup>, Yiting Zhang<sup>1</sup>, Yujia Chai<sup>1</sup>, Jiayan Long<sup>1</sup>, Yuxi Zhang<sup>1</sup>, Yan Zhao<sup>2</sup>, Yunpeng Huang<sup>1,\*</sup> and Tianxi Liu<sup>1,\*</sup>

<sup>1</sup> Key Laboratory of Synthetic and Biological Colloids, Ministry of Education, School of Chemical and Material Engineering, Jiangnan University, Wuxi, 214122, P. R. China

<sup>2</sup> College of Energy Material and Chemistry, College of Chemistry and Chemical Engineering, Inner Mongolia University, Hohhot, 010021, P. R. China

\*Corresponding authors. E-mail: [hypjnu@jiangnan.edu.cn](mailto:hypjnu@jiangnan.edu.cn) (Y. P. Huang), [txliu@jiangnan.edu.cn](mailto:txliu@jiangnan.edu.cn) (T. X. Liu)

### Supplementary Figures

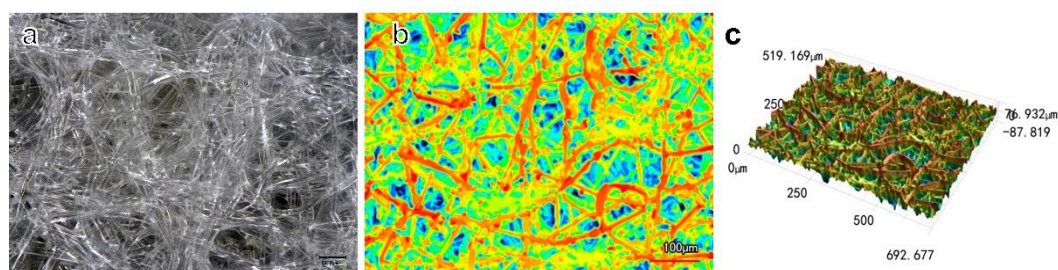

**Fig. S1** (a) Optical microscopic, (b) contour map and (c) 3D surface topographic images of pure SEBS fabric

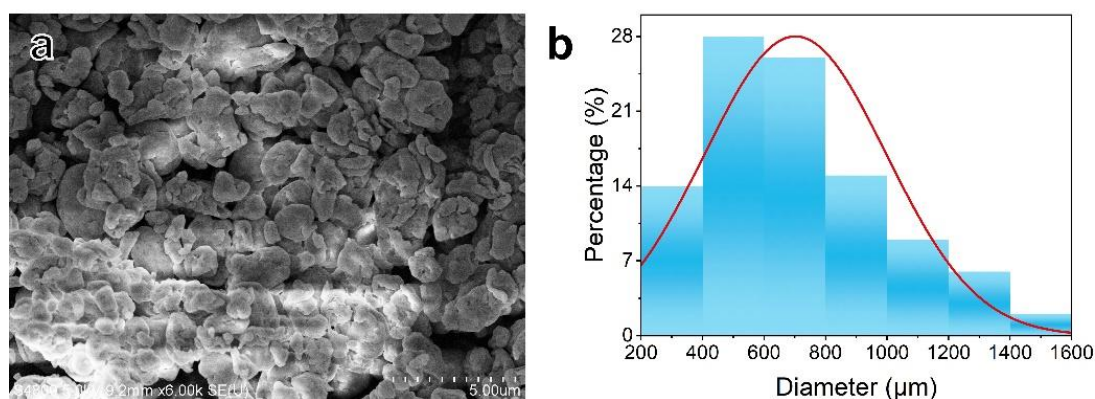

**Fig. S2** (a) SEM image and (b) diameter distribution of PTFE microparticles applied in this study

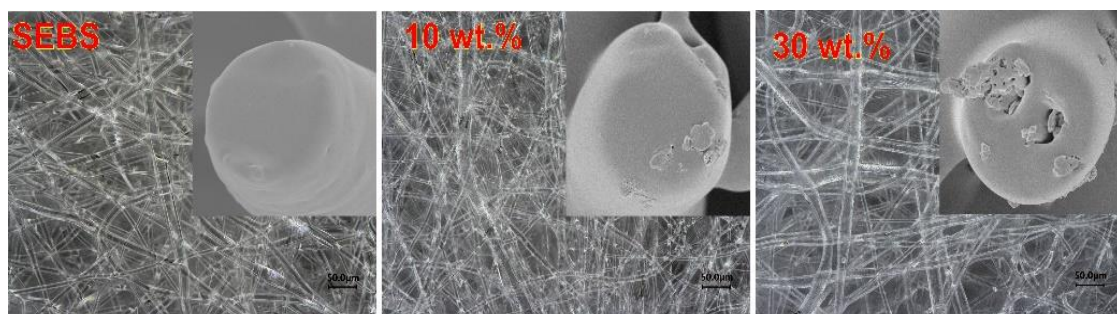

**Fig. S3** Optical and SEM images of pure SEBS and SPM microfibers with 10 wt% and 30 wt% PTFE loading

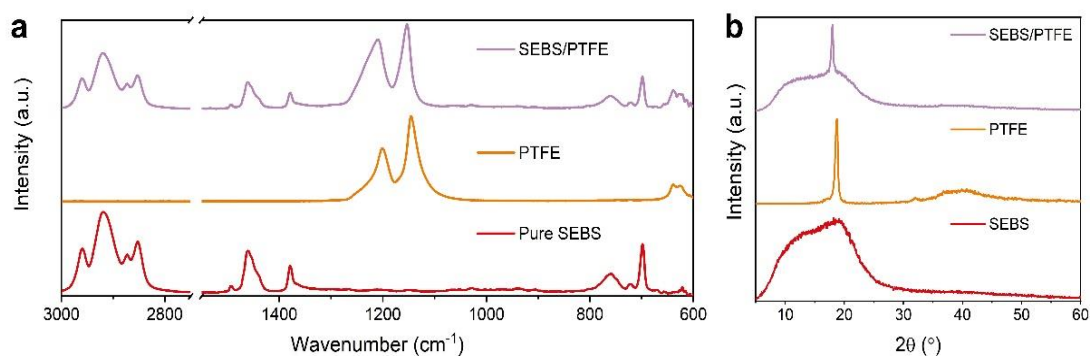

**Fig. S4** (a) FTIR spectra and (b) XRD patterns of pure SEBS fabric, PTFE microparticles and SPM fabric

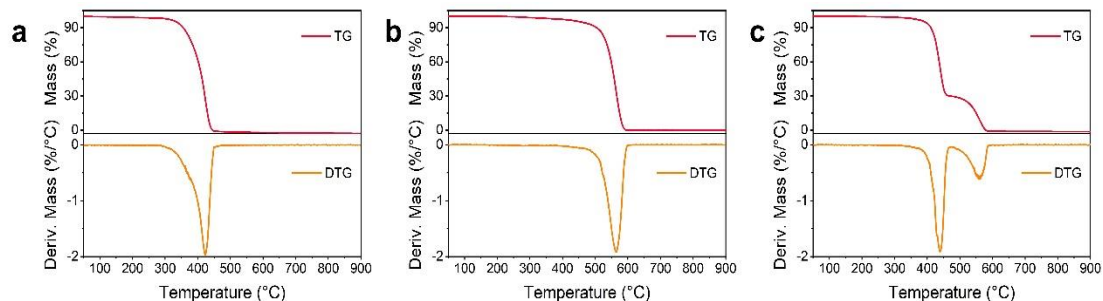

**Fig. S5** TGA curves of (a) SEBS, (b) PTFE and (c) SPM microfibers

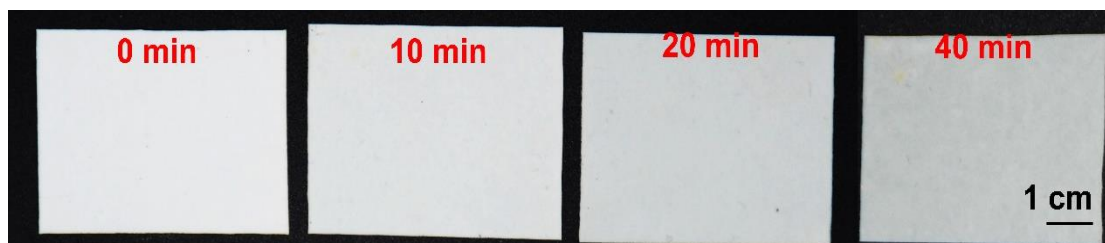

**Fig. S6** Digital photos of tSPM fabrics treated for different times under 150 °C

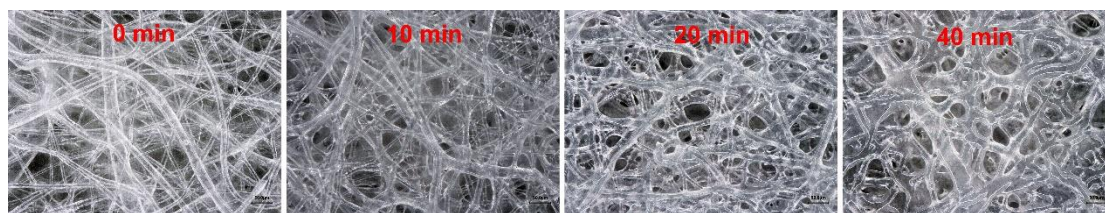

**Fig. S7** Optical microscopic images of tSPM fabrics treated for different times under 150 °C

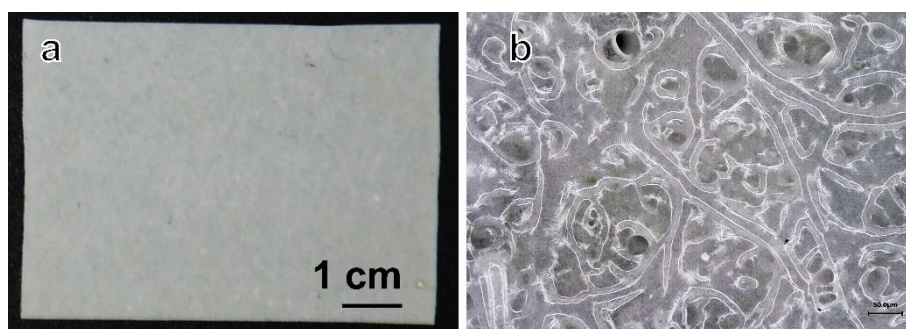

**Fig. S8** (a) Digital and (b) optical images of tSPM fabric after thermal treatment for 60 min

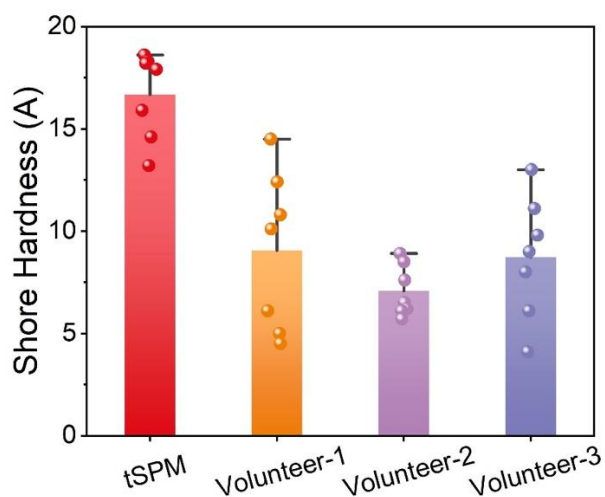

**Fig. S9** Shore hardness of tSPM fabric, and skins of volunteer-1 (male, 28 years old), volunteer-2 (male, 24 years old) and volunteer-3 (female, 26 years old)

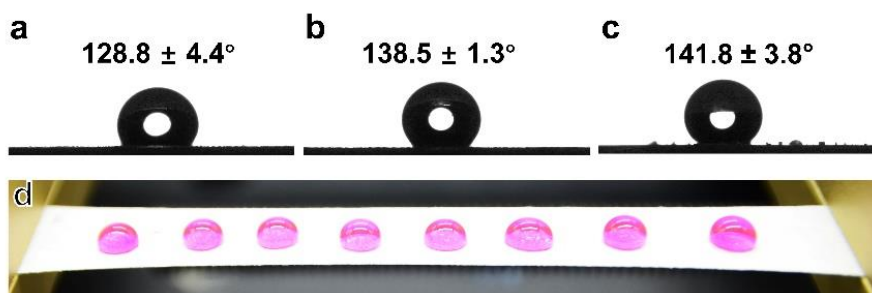

**Fig. S10** Water contact angles of (a) pure SEBS fabric, (b) tSPM fabric, (c) PTFE particles, and (d) digital photo of water droplets on tSPM fabric under a strain of 1000%

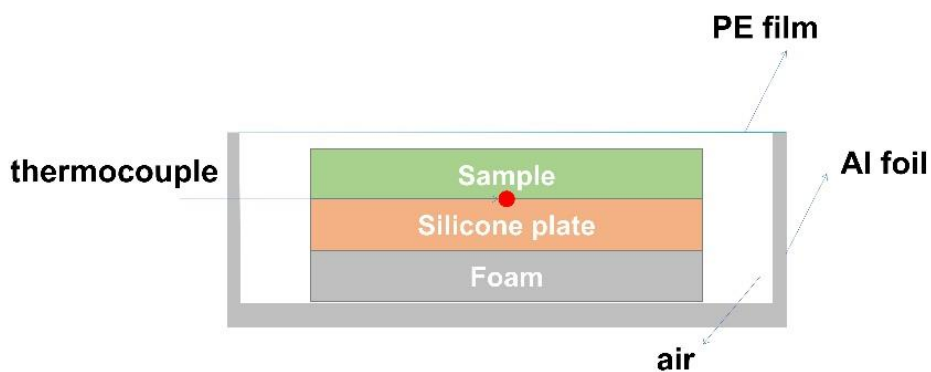

**Fig. S11** Schematic of the set-up for radiative cooling tests

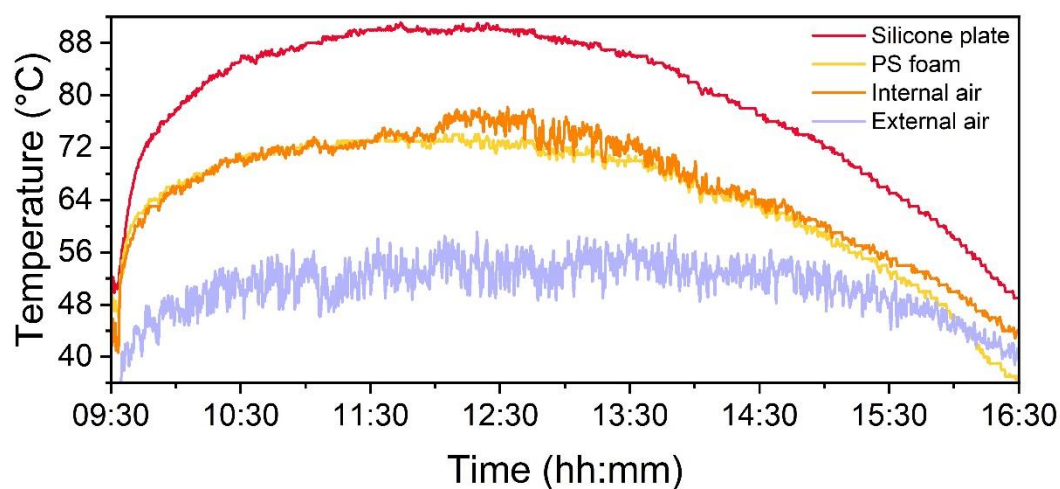

**Fig. S12** Temperatures of silicone plate, PS foam and air inside/outside the PS box under direct sunlight irradiation

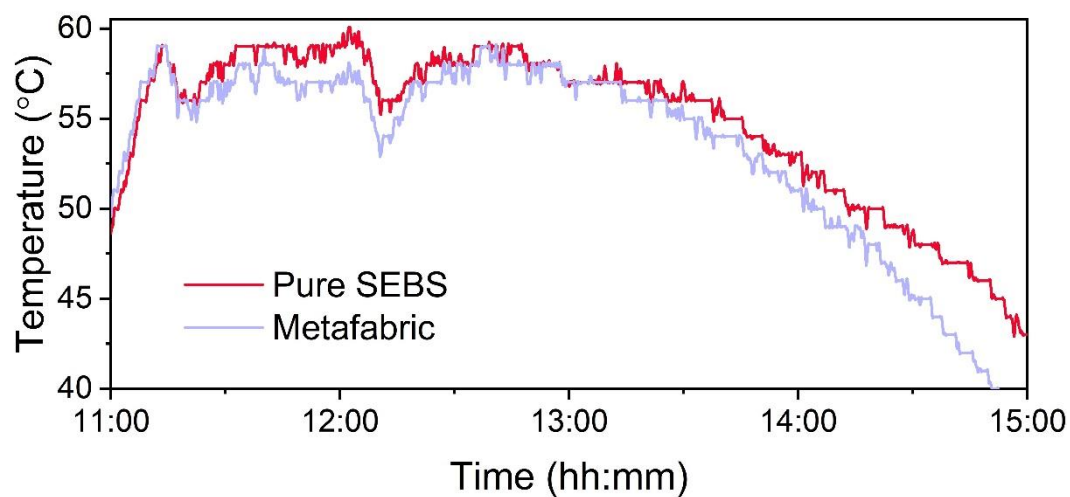

**Fig. S13** Temperature comparison of pure SEBS microfibers and metafabric under passive cooling tests
